# Supplementary material for: The reported anomalous emission intensity of the 5D0 → 7F4 transition of Eu3+ in a molybdate double perovskite
Source: Royal Society of Chemistry journal article supplement (doi:10.1039/c4tc02490g), 2014-12-19
Supplement: c4tc02490g1.pdf [file c4tc02490g1.pdf]

# The reported anomalous emission intensity of the $^5D_0 \rightarrow ^7F_4$ transition of $\text{Eu}^{3+}$ in a molybdate double perovskite

Wai-Lun Chan,<sup>b</sup> Zhenyu Liu,<sup>b</sup> Shengbo Lu,<sup>c</sup> Peter A. Tanner,<sup>\*a</sup> and Ka-Leung Wong<sup>\*b</sup>

---

## Supporting Information

### 1. Synthesis of samples

The synthesis method followed that of Ye et al.<sup>1</sup> Stoichiometric amounts, according to each chemical formula, of  $\text{SrCO}_3$  (99.995%),  $\text{CaCO}_3$  (>99.999%),  $\text{MoO}_3$  (99.98%),  $\text{Eu}_2\text{O}_3$  (99.999%),  $\text{Yb}_2\text{O}_3$  (>99.99%),  $\text{Li}_2\text{CO}_3$  (99.997%),  $\text{WO}_3$  (99.995%) and  $\text{MnO}_2$  (99.99%), all purchased from Sigma-Aldrich were mixed and ground thoroughly for solid state calcination in a furnace at different high temperatures for fixed periods of time, step by step: (i) 600 °C for 5 h, (ii) 1000 °C for 5 h, and (iii) 1150 °C for 20 h, with intermediate grinding between the steps.

The samples prepared were:

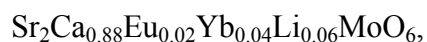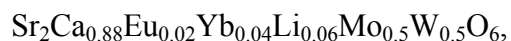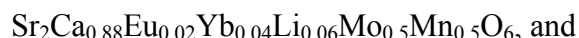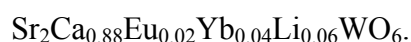

### 2. Characterization of samples

Selected X-ray diffractograms are displayed below and are similar to the results of Ye et al.<sup>1</sup>

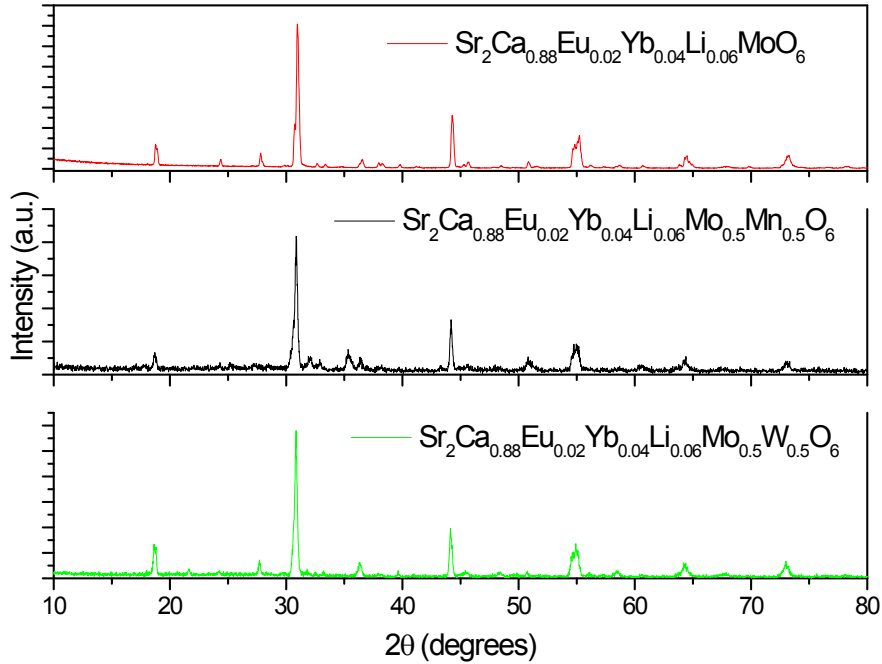

### 3. Instrumentation

Photoluminescence measurements were conducted by using an Edinburgh FLS920 steady-state photoluminescence spectrometer with UV-Visible and NIR detectors, as well as a 0.5 W 980 nm diode laser system. Emission lifetimes were measured by a Nd:YAG ns pulsed laser, wavelength: 355 nm, pulse width: 10 ns, repetition frequency: 10 Hz, peak power:  $\sim 3.8$  mJ, with a PMT detector and a Tektronics DPO 4104B oscilloscope.

**Table S1.** Literature data for energy of lowest  ${}^7F_4$  level and  ${}^5D_0$  level of  $\text{Eu}^{3+}$  in selected lattices.<sup>11</sup>

| System                                              | Lowest ${}^5D_4$ level ( $\text{cm}^{-1}$ ) | ${}^5D_0$ level ( $\text{cm}^{-1}$ ) | Highest energy ${}^5D_0 \rightarrow {}^7F_4$ transition (nm) |
|-----------------------------------------------------|---------------------------------------------|--------------------------------------|--------------------------------------------------------------|
| $\text{LaCl}_3:\text{Eu}^{3+}$                      | 2751                                        | 17267                                | 688.9                                                        |
| $\text{LaF}_3:\text{Eu}^{3+}$                       | 2775                                        | 17290                                | 688.9                                                        |
| $\text{EuF}_3$                                      | 2775                                        | 17290                                | 688.9                                                        |
| $\text{EuCl}_3 \cdot 6\text{H}_2\text{O}$           |                                             | 17260                                |                                                              |
| $\text{Y}_2\text{O}_3:\text{Eu}^{3+}$               | 2672                                        | 17221                                | 687.3                                                        |
| $\text{Gd}_2\text{O}_3:\text{Eu}^{3+}$              | 2748                                        | 17283                                | 688.0                                                        |
| $\text{Y}_2\text{O}_2\text{S}:\text{Eu}^{3+}$       | 2583                                        | 17143                                | 686.8                                                        |
| $\text{YVO}_4:\text{Eu}^{3+}$                       | 2700                                        | 17183                                | 690.5                                                        |
| $\text{YPO}_4:\text{Eu}^{3+}$                       | 2752                                        | 17211                                | 691.6                                                        |
| $\text{Y}_3\text{Al}_5\text{O}_{12}:\text{Eu}^{3+}$ | 2856                                        | 17220                                | 696.2                                                        |
| $\text{Eu}_3\text{Ga}_5\text{O}_{12}$               | 2448                                        |                                      |                                                              |
| $\text{KY}_3\text{F}_{10}:\text{Eu}^{3+}$           | 2748                                        | 17269                                | 688.7                                                        |
| $\text{Cs}_2\text{NaEuCl}_6$                        | 2674                                        | 17220                                | 687.5                                                        |
